# Supplementary material for: Design and synthesis of catenated rings based on toroidal DNA structures
Source: Royal Society of Chemistry journal article supplement (doi:10.1039/c1cc14957a), 2011-01-01
Supplement: c1cc14957a.pdf [file c1cc14957a.pdf]

## Electronic Supplementary Information

### Design and synthesis of catenated rings based on toroidal DNA structures

Zhaoqi Yang, Dawei Li and Tianhu Li\*

Division of Chemistry and Biological Chemistry, School of Physical and Mathematical Sciences, Nanyang Technological University

#### Materials and Methods:

**Reagents:** *Taq* DNA Polymerase, T4 DNA ligase, Nuclease BAL-31, Sac I and Cre recombinase were purchased from New England Biolabs (Ipswich, MA). Human Topoisomerase I was obtained from TopoGEN (Columbus, OH). pGH plasmid that contains our newly designed DNA sequence was provided by Generay Biotech (Shanghai, China) and single strand oligonucleotides were produced by Sigma-Aldrich (Singapore).

**PCR amplification of Linear DNA 1:** A reported standard PCR amplification process<sup>1-2</sup> was followed in our studies to obtain Linear DNA 1 using oligonucleotides 5'GTGGATCCTCGTCGCAAAC3' and 5'CCGGATCCATGGTTAACCC3' as forward and reverse primers and pGH plasmid as template.

**Preparations of Linear DNA 2:** A mixture containing 2 pmol Linear DNA 1, 5 U of Sac I, 10 mM Bis-Tris-Propane-HCl, 10 mM MgCl<sub>2</sub>, 1 mM Dithiothreitol was incubated 37 °C for 2 hours. The resultant cohesive end-containing Linear DNA 2 was purified using the QIAquick Purification Kits (Qiagen).

**Preparations of Circular DNA 1:** A mixture containing 2 pmol Linear DNA 2, 60 mM Tris-HCl (pH 7.6), 25 mM NaCl, 13 mM MgCl<sub>2</sub>, 10 mM DTT, 1mM ATP, 25 mg/ml BSA and 10 U of T4 DNA ligase was incubated at 16 °C for 16 hours. The resultant mixture was further incubated with BAL-31 at 30 °C for 2 hours, which were then analyzed using 2.5% agarose gel electrophoresis. The DNA product that is corresponding to Band 1 in Lane 5 of Figure 2B was purified next using Mini Prep Cell (Bio-rad) before AFM examination.

**Reaction of relaxed form of Circular DNA 1 with Human Topoisomerase I:** A mixture containing 0.2 pmol circular DNA 1, 1 U of Human Topoisomerase I, 10 mM Tris-HCl (pH 7.9), 150 mM NaCl, 0.1% bovine serum albumin (BSA), 0.1 mM spermidine and 5% glycerol was incubated at 37 °C for 1 hour followed by analysis using 2% agarose gel electrophoresis.

**Formation of catenated DNA:** A mixture containing 0.2 pmol Circular DNA 1, 50 mM Tris-HCl, 33 mM NaCl, 10 mM MgCl<sub>2</sub> and 1 U of Cre recombinase was incubated at 37 °C for 12 hours. The resultant reaction mixture was further analyzed using 2.5% agarose gel electrophoresis.

### **AFM studies of our synthesized catenated DNA**

(a) *Immobilization of DNA samples on mica*<sup>3-5</sup>: A buffer (PH 7.0) containing 40 mM HEPES and 10 mM MgCl<sub>2</sub> was placed on freshly cleaved mica, which was further kept at room temperature for 5 min. The pre-prepared mica was rinsed with dd water thoroughly and dried under the argon flow. A 20 µL solution that contains DNA sample was deposited on the mica, which was subsequently incubated for 5 min, washed with H<sub>2</sub>O, dried under the argon flow and then stored in vacuum

cabinet.

(b) *AFM examination*: AFM images of DNA were obtained in Tapping Mode<sup>TM</sup> on a Multimode<sup>TM</sup> AFM (Veeco, Santa Barbara, CA) in connection with a Nanoscope V<sup>TM</sup> controller. Antimony (n) doped Si cantilevers with nominal spring constants between 20 and 80 N/m were selected. Scan frequency was 1.9 Hz per line and the modulation amplitude was in a nanometer range<sup>6-7</sup>. All DNA sample determinations were carried out in air at room temperature.

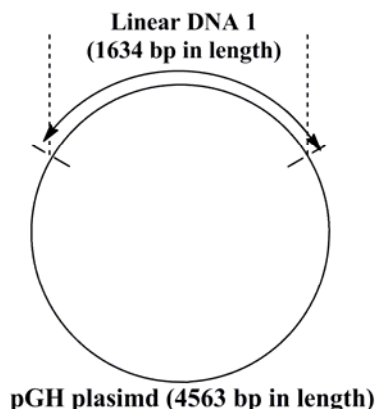

### Nucleotide sequence of Linear DNA 1 (PCR product from pGH plasmid)

5' GTGGATCCTCGTCGCAAAACGAGCTCAGTTGGGTAATTTTAGGGTTTCCAGTTTGGAGTGTGTTTTTCGACGGAATCCCTTTTACGACTCACTTTTGCCTTGACTAGA  
3' CACCTAGGAGCAGCGTTTTCCTCGAGTCAACCCATTAAAAATCCCAAAAGGGTCAAACTGCAACAAAAGCTGCCTTAAGGGAAAAATGCTGAGTGAAAAACGGAACGTATCT

GGGTTTTACCCCATGGTCTATTTTGGTCTTTTGCATAACTTTTATAGCATACTTTTACGAGTGTATAAGCTGTTTTGCCATAACTTTTGCATAACTTTTATAGCAT  
CCCAAAATGGGTACCAGTAAAAACGAAACGGTATTGAAAAATATCGTATGTAAAAATGCTCAAAATATTTCGACAAAACGGTATTGAAAAACGGTATTGAAAAATATCGTA

ACATTTTACGAGTTTTATAAGCTGTTTTTGCATAACTTTTATAGCATACTTTTACGAGTGTATAAGCTGTTTTTCATGAGGCTTCTTTTATAGGTTTTGTGTCATGATTTTA  
TGTAATGCTCAAAATATTTCGACAAAACGGTATTGAAAAATATCGTATGTAAAAATGCTCAAAATATTTCGACAAAACGGTACTCCGAAGAAAAATATCCAAAACAGTACTAAAAAT

ATGGTATCTTTTGCATAACTTTTATAGCATACTTTTACGAGTGTATAAGCTGTTTTTCATGAGGCTTCTTTTATAGGTTTTGTGTCATGATTTTAATGGTATCTTTTCGT  
TACCATAGAAAAACGGTATTGAAAAATATCGTATGTAAAAATGCTCAAAATATTTCGACAAAACGGTACTCCGAAGAAAAATATCCAAAACAGTACTAAAAATACCATAGAAAAAGCA

CGGTGGCATTTCGGGGTTTTGCGCGGATGCCTTTTGTATGGGCTTTTACATCAGGTTTTTCCGCTCAGCAATGATTTTGCCTTTTAGATTTTCAATGATATTTT  
GCCACCGTAAAAAGCCCAAAACCGCCTACGGAAAAACAATACCCGAAAAATGTAGTCCAAAAAGGCGAGTCTTACTAAAAACGGGAAAAATCTAAAAAGTTACTATAAAAA

AGGCGTTTTGACGTTTTTTCAGTTTTTCCGTCGCGCTTTTCCCTTTTTCGCGCATTTCGCGCACTTTTTCGCAATATTTTTGGAGTGTGTTGATCCGTTTTGATTTTCA  
TCCGAAAAACTGCAAAAGTCAAAAGGCACAGCGGAAAAAGGAAAAACCGGTAAAAACCGGTGAAAAACGTATATAAAAACTCAACAAAACAGGCAAACTAAAAAGT

Lox P site 1

GTGCGTTTTTGGCCATTTTGCCTAGTTTTTATAACTTCGTATAGCATACTTTTACGAGTGTATAAGCTGTTTTTGTAAATTTTGCCTTTTTCGATTTTTCGCTATTTTTG  
CACGCAAAACCGGTAAAAACGGTAAAAAATATTGAAGCATACTGTATGTAATGCTTCAATAAACGATAAAAAACAATTAATAAACGGTAAAAAGCATAAAAAGCATAAAAAC

GCATTTTTCAGCATTCTTCTGTTTTGCAAGTTTTTCGGCGTTTTTGGAGTGTAAATTTTACGTCAGATTGATTTTTCAGTGCCTTTTTAAGCTTTTTGCAAGTGTTTTTG  
CGTAAAAACCGTAAAAAGAACAAAAACGGTAAAAAGCCGCAAAAAACCTCAACTTAAATGCAGGCTAAACTAAAAGTCAAGCAAAAAATTCGAAAAACGTCAAAAAACG

CTCTGCTATTTTGTAAATTTTGCCTTTTTCAGGATTTTTCGCTATTTTGGCATTTTTGTGCTGCTTTTTTAGTCGTTTTTGGCCATTTTCTGTTTTGCTCAGCCAT  
GAGACGATAAAAAACAATTAATAACGGTAAAAAGCTCCATAAAAGCGTAAAAACCGTAAAAACGACGTAATAAACCGGTAATAAACCGGTAATAAACCGGTAATAAACCGGTA

TTTCGCTGGTCCGAGTTTTGATGCTTTTTGCAAGTTTTTGCAGGTTTTTGCACGAGTTTTTGCACGACTGGTTTTTACAGCGGTTTTTTCAGGCTTTTTGCAACAATTTTAAAGCTTTTTG  
AAAGCGACCCAGGCTCAAAACTACGAAAAACGTCAAAACAGTGTCTAAAAACTGTAGCTGACCAAAAGTGTGCGCAAAAGTCCGAAAAACGGTGTGAAAAATTCGAAAAAC

AAGGAGAGAAGATTTGGGTCTCAGTTTTGATACCCGACGATTTTGCACCCAGATTTTTCAGGCGTTTTGGGCTCAGTTTTGATACCCGACGATTTGACACCAGATTTTGC  
TTCTCTCTTCTAAAAACCGAGTCAAAACTATGGGCTGCTAAAACTGTGGTGTAAAAACGTCGCAAAACCGGAGTCAAAACTATGGGCTGCTAAAACTGTGGTGTAAAAACG

Lox P site 2

AGGCGTTTTGAGCCATTTTTCGCTATAGCATTGATGATCGATTTTTCCATGATAACTTCGTATAGCATACTTATACGAAGTTATTTTTGGGCTCAGTTTTGATACCCGATC  
TCCGAAAAACTCGTAAAAACGATATCGTAAAAACCTATGCTACAAAAGTACTATTGAAGCATACTGTATGTAATGCTTCAATAAAAAACCGGAGTCAAAACTATGGGCTAG

TTTTGACACCAGATTTTGCAGGCGTTTTTTCGCTATAGCATTGATGATCGATTTTTCCATGTTTTAGTGGTTTTTGCAGTACGTTTTTCGCCATGGTAGTCAT  
AAAATGTGGTGTAAAAACGTCGCAAAACCTCGTAAAAACGATATCGTAAAAACCTATGCTACAAAAGTACTATTGAAGCATACTGTATGTAATGCTTCAATAAAAAACCGGAGTCAAAACTATGGGCTAG

TTTTATAGCTGTTTTGTGTGAGATTTTATCCGCTCACTTTTCGAATTCCTTTTACGAGCCGGATTTTTCGGTGTGGCTTTTTGTCCGTTTTTCCGTTTTGAGCTCGGGGTAA  
AAAATATCGCAAAAAACACTCTAAAAATAGGCGAGTAAAAAGCTTAAGAAAAATGCTCGGCTAAAAACCGCACCCGAAAAACAGGCAAAAGGCAAACTCGAGCCCAAT

CCATGGATCCGG 3'  
GGTACCTAGGCC 5'

Figure S1

## Nucleotide sequence of Linear DNA 2

nucleotide 1  
 ↓  
 5' CAGTTGGGTAATTTTAGGGTTTTCCAGTTTTGACGTTGTTTTTCGACGGAATCCCTTTTACGACTCACTTTTGCCTTGACTAGA  
 3' TCGAGTCAACCCATTAAAAATCCCAAAGGGTCAAACCTGCAACAAAAGTGCCTTAAGGAAAAATGCTGAGTGAAAAACGGAACTGATCT

GGTTTTTACCCATGGTCTATTTTGGTCTTTTGCCATAACTTTTTATAGCATACATTTTACGAGTTTTATAAGCTGTTTTTGCATAACTTTTTGCCATAACTTTTTATAGCAT  
 CCCAAAAATGGGGTACCAGATAAAAAACGAAAAACGGTATTGAAAAATATCGTATGTAATAATGCTCAAAAATATTCGACAAAAACGGTATTGAAAAACGGTATTGAAAAATATCGTA

ACATTTTACGAGTTTTATAAGCTGTTTTTGCATAACTTTTTATAGCATACATTTTACGAGTTTTATAAGCTGTTTTTTCATGAGGCTTCTTTTTATAGGTTTTTGTGTCATGATTTTA  
 TGTAAAAATGCTCAAAAATATTCGACAAAAACGGTATTGAAAAATATCGTATGTAATAATGCTCAAAAATATTCGACAAAAAGTACTCCGAAGAAAAATATCCAAAAACAGTACTAAAAAT

ATGGTATCTTTTGCATAACTTTTTATAGCATACATTTTACGAGTTTTATAAGCTGTTTTTTCATGAGGCTTCTTTTTATAGGTTTTTGTGTCATGATTTTAATGGTATCTTTTCGT  
 TACCATAGAAAAACGGTATTGAAAAATATCGTATGTAATAATGCTCAAAAATATTCGACAAAAAGTACTCCGAAGAAAAATATCCAAAAACAGTACTAAAAATACCATAGAAAAAGCA

CGGTGGCATTTTTCGGGGTTTTGCGCGGATGCCTTTTTGTTTATGGCCCTTTTACATCAGGTTTTTTCGCTCAGCAATGATTTTGCCTTTTATAGTTTTTCAATGATATTTT  
 GCCACCGTAAAAAGCCCCAAAACGGCTTACGAAAAACAATACCCGAAAAATGTAGTCAAAAAAGCGAGTCTTAAAAACGGAAAAATCAAAAAGTTACTATAAAAA

AGGCGTTTTTTCAGTTTTTCCGTGTCGCCCTTTTCCCTTTTTTTCGCAATTTTTTCGGCACTTTTTTGCATATTTTTTGGAGTTGTTTTGATCCGTTTTGATTTTCA  
 TCCGCAAAAACCTCAAAAAGTCAAAAAGGCACAGCGGAAAAAGGAAAAACCGCTAAAAAAGCCGTAAAAAACGATATAAAAAACCTCAACAAAACCTAGGCAAAAACCTAAAAAT

nucleotide 700 Lox P site 1 nucleotide 734  
 GTGCGTTTTTGGCCATTTTTCGCTAGTTTTTATAAATTCGTATAGCATACATTTACGAGTTATTGCTATTTTTGTTAATTTTTGCAATTTTTCGTATTTTCGCTATTTTTG  
 CACGCAAAAACCGGTAAAAACGGTAAAAAATATTGAAGCATATCGTATGTAATAATGCTTCAATAAACGATAAAAAACAATAAAAACGGTTAAAAAGCATAAAAAGCATAAAAAC

GCATTTTTCAGCATTTTCTGTTTTGCAAGTTTTTCGGCCGTTTTTGGAGTTGAATTTTACGTCCAGATTTGATTTTTCAGTGCCTTTTTAAGCTTTTTTCAGTGTTTTTG  
 CGTAAAAACCTGGTAAAAAGAACAAAAACGGTTCAAAAAGCCGCAAAAAACCTCAACTTAAAAATGAGTCTAAAAATCAAGTCAAGCAAAAAATTCGAAAAACCTCAAAAAAC

CTCTGCTATTTTGTAAATTTTTGCAATTTTCGAGGATTTTTCGCTATTTTTGGCATTTTTTGTGTCATTTTTTAGTCGTTTTTGGCCATTTTCTGTTTTTGCTCACCCAT  
 GAGCAGATAAAAAACAATAAAAACGGTAAAAAGCTCCATAAAAGCGATAAAAAACCGTAAAAACCGCAGTAAAAATCAGCAAAAAACGGTAAAAAGGCAAAAAACGAGTGGTA

TTTTGCTGGTCCGAGTTTTTGTATGCTTTTTGCAAGTTTTTGCACAGTTTTTGCATCCGACTGTTTTTCACAGCGGTTTTTCAGGCTTTTTGCAACAACATTTTAAGCTTTTTG  
 AAAAGCACCAGGCTCAAAAACCTACGAAAAACGTCAAAAACAGTCTCAAAAACCTGAGCTCAAAAAGTTCGCAAAAAACGGTAAAAAGGCAAAAAACGATGGTA

AAGGAGAGAAGATTTTGGGCTCAGTTTTTGATACCCGACGATTTTGCACCCAGATTTTTCAGGCGTTTTTGGGCTCAGTTTTGATACCCGACGATTTTGCACCCAGATTTTGC  
 TTCTCTCTTCAAAAACCCAGATCAAAAACCTATGGGCTGCTAAAACTGGTGTAAAAACGTCGCAAAAACCCGAGTCAAAAACCTATGGGCTGCTAAAACTGGTGTAAAAACG

nucleotide 1303 Lox P site 2 nucleotide 1337  
 AGGCGTTTTTTCAGCATTTTTCGCTATAGCATTTTGGATACGATGTTTCCATGATAAATTCGTATAGCATACATTATACGAAAGTATTTTTGGGCTCAGTTTTGATACCCGATC  
 TCCGCAAAAACCTGGTAAAAACGATATCGTAAAAACCTATGCTACAAAAGTACTATTGAAGCATATCGTATGTAATAATGCTTCAATAAAAAACCGAGTCAAAAACCTATGGGCTG

TTTTGACACCAGATTTTTCAGGCGTTTTTTCAGCATTTTTCGCTATAGCATTTTGGATACGATGTTTCCATGTTTTTAGTGGTTTTTTCAGTACGTTTTTCGCAATGGTATGAT  
 AAAACTGTTGTGCTAAAAACGTCGCAAAAACCTCGGTA AAAACGATATCGTAAAAACCTATGCTACAAAAGTACAAAATCACC AAAACCTGCTCGAAAAAGCGGTACCATCAGTA

TTTTATAGCTTTTTTGTGTGAGATTTTTATCCGCTCACTTTTCGAATTCCTTTTACGAGCCGGATTTTTGCGGTGGCTTTTTGTCCGTTTTTCCCTGTTTGTAGCT 3'  
 AAAATATCGCAAAAAACACTCTAAAAATAGGCGAGTAAAAAGCTTAAGGAAAAATGCTCGGCCATAAAAACCGCACCCGAAAAACAGGCAAAAGGACAAAC 5'

nucleotide 1588

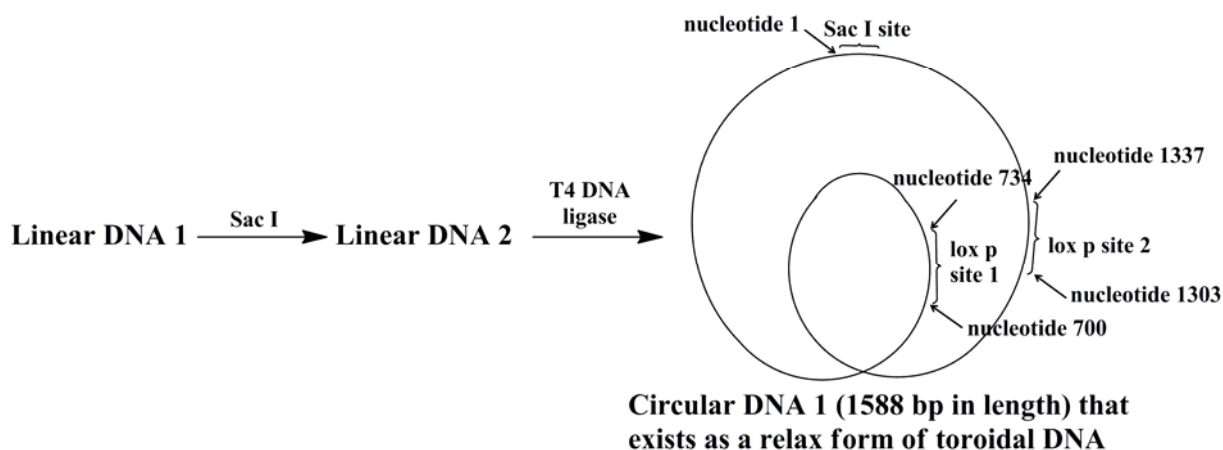

Figure S2

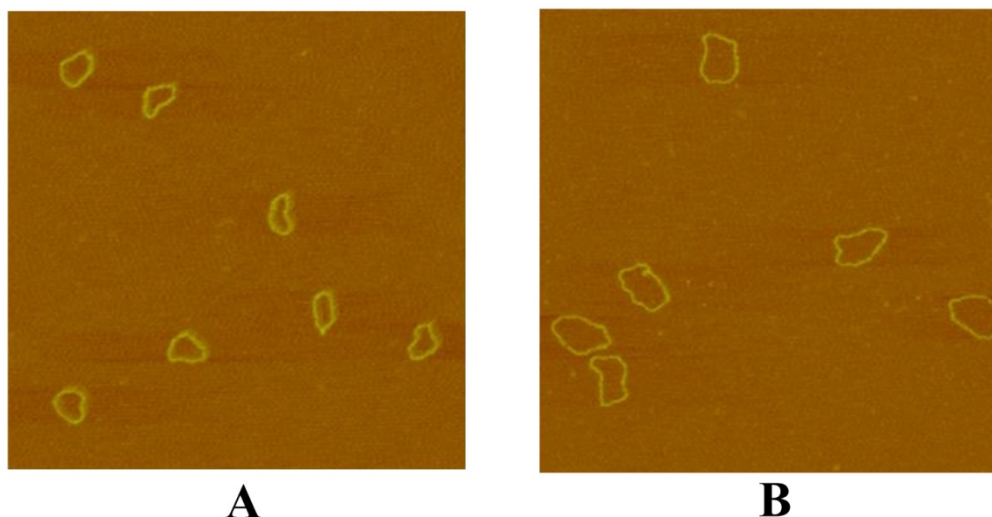

Figure S3. AFM images of Non-Catenated Ring 1 and Non-Catenated Ring 2. A: AFM image of Non-Catenated Ring 1 (603 bp in length) that are corresponding to Band 4 in Lane 3 in Figure 3A (1  $\mu\text{m}$  x 1  $\mu\text{m}$  scans). B: AFM image of Non-Catenated Ring 2 (985 bp in length) that are corresponding to Band 3 in Lane 3 in Figure 3A (1  $\mu\text{m}$  x 1  $\mu\text{m}$  scans).

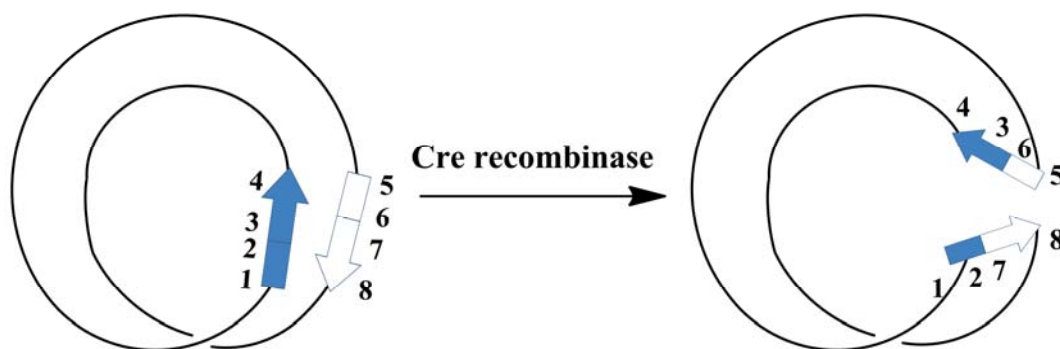

Figure S4. Schematic illustration of strand recombination of toroidal DNA in which two lox p sites are aligned in an anti-parallel fashion. This Cre recombinase-catalyzed reaction does not lead to any catenated DNA structure. (↑ indicates the lox p site)



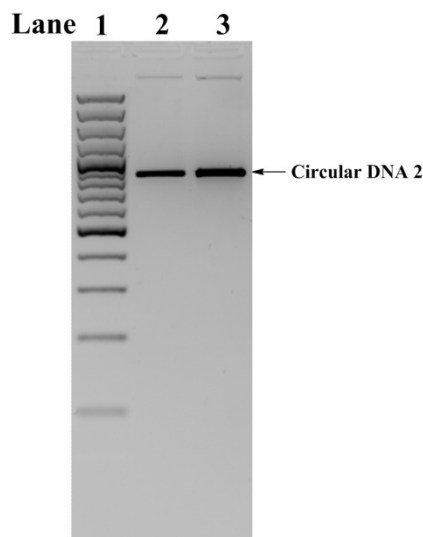

Figure S5. Electrophoretic analysis of reactions between Circular DNA 2 and Cre recombinase. Lane 1: molecular weight markers; Lane 2: Circular DNA 2 alone; Lane 3: reaction mixture of Circular DNA 2 and Cre recombinase.

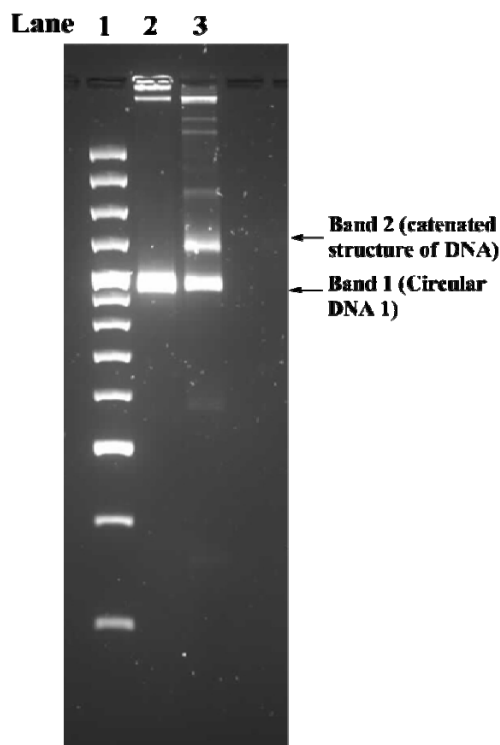

Figure S6. Optimization of reaction yield for formation of catenated DNA structure. Lane 1: molecular weight markers; Lane 2: Circular DNA 1 alone; Lane 3: reaction mixture of Circular DNA 1 and Cre recombinase. The reaction mixture loaded in Lane 3 was prepared as follows : 4 U (1 U each time) of Cre recombinase was added to a solution containing 0.2 pmol Circular DNA 1, 50 mM Tris-HCl, 33 mM NaCl and 10 mM MgCl<sub>2</sub> for four times within 20 minute intervals. After each addition of Cre recombinase, the resultant solution was further incubated at 37 °C. The reaction yield is ~16%.

### References for Supplementary Information:

1. R. K. Saiki, D. H. Gelfand, S. Stoffel, S. J. Scharf, R. Higuchi, G. T. Horn, K. B. Mullis and H. A. Erlich, *Science*, 1988, **239**, 487-491.
2. A. R. Pavlov, N. V. Pavlova, S. A. Kozyavkin and A. I. Slesarev, *Trends Biotechnol*, 2004, **22**, 253-260.
3. Y. L. Lyubchenko, A. A. Gall, L. S. Shlyakhtenko, R. E. Harrington, B. L. Jacobs, P. I. Oden and S. M. Lindsay, *J Biomol Struct Dyn*, 1992, **10**, 589-606.
4. Y. L. Lyubchenko and L. S. Shlyakhtenko, *Methods*, 2009, **47**, 206-213.
5. F. Moreno-Herrero, L. Holtzer, D. A. Koster, S. Shuman, C. Dekker and N. H. Dekker, *Nucleic Acids Research*, 2005, **33**, 5945-5953.
6. Y. L. Lyubchenko, L. S. Shlyakhtenko, T. Aki and S. Adhya, *Nucleic Acids Research*, 1997, **25**, 873-876.
7. L. Hamon, D. Pastre, P. Dupaigne, C. Le Breton, E. Le Cam and O. Pietrement, *Nucleic Acids Res*, 2007, **35**, e58.
